# Supplementary material for: Application of an in vitro neuroinflammation model to evaluate the efficacy of magnesium-lithium alloys
Source: Front Cell Neurosci. 2024 Oct 29;18:1485427. doi: 10.3389/fncel.2024.1485427 (PMC11558531; doi:10.3389/fncel.2024.1485427)
Supplement: Supplementary file 1 [file Table_1.XLSX]

## Sheet: HMC3
Sample type	Antibodies added	Intensity FL1 (525/30 nm emission filter)			Intensity FL3 (615/25 nm emission filter)			P_rel (I_FL3,pGSK+tGSK/I_FL3,tGSK)
		mean	median	CV	mean	median	CV			tGSK	Alexa Fluor® 488 conjugated anti-GSK3β antibody (Monoclonal Rat IgG2b, 0.5 μg/mL)
untreated 1	pGSK+tGSK	225.71	169	99.11	684.01	576	69.87	4.28929		pGSK	anti-phospho-GSK3β (Ser9) antibody (monoclonal rabbit IgG, 1 µg/mL)
	pGSK+tGSK	191.14	141	86.97	637.65	556	64.1			secondary antibody	Goat anti-rabbit antibody, texas-red conjugated (4 µg/mL)
	tGSK	178.16	136	86.96	157.26	126	119.37
	tGSK	146.93	113	91.35	150.87	126	158.97
	none	30.16	24	107.1	46.72	36	102.82
untreated 2	pGSK+tGSK	112.56	78	125.83	460.4	376	88.03	2.97425
	pGSK+tGSK	108.36	74	116.39	452.1	374	83.85
	tGSK	119.78	83	78.13	156.6	110	57.26
	tGSK	129.59	88	110.44	150.2	113	116.41
	none	23.83	20	72.69	34.99	29	75.31
untreated 3	pGSK+tGSK	225.03	163	96.98	409.91	335	87.47	3.1082
	pGSK+tGSK	214.7	157	93.63	417.96	348	82.73
	tGSK	202.55	141	100.53	138.55	106	204.93
	tGSK	182.97	136	101.43	127.8	102	128.5
	none	25.43	21	81.91	37.53	30	84.49
untreated 4	pGSK+tGSK	207.13	157	83.16	560.04	464	72.09	2.9849
	pGSK+tGSK	237.78	181	89.45	546.64	464	72.24
	tGSK	214.91	163	88.24	189.11	151	98.08
	tGSK	228.44	175	84.57	181.65	151	75.03
	none	28.25	23	161.96	41.65	33	132.82
untreated 5	pGSK+tGSK	182.03	131	100.73	457.11	387	85.35	3.33639
	pGSK+tGSK	190.11	131	109.07	543.74	448	79.1
	tGSK	169.92	131	93.64	151.67	126	78.41
	tGSK	161.4	122	93.91	148.31	122	99.05
	none	27.38	22	84.44	42.07	33	86.18
untreated 6	pGSK+tGSK	163.6	118	96.96	387.7	323	74.28	2.09942
	pGSK+tGSK
	tGSK	175.05	122	110.57	184.67	141	116.89
	tGSK
	none	29.13	22	143.77	42.74	33	125.11
LPSCM 1	pGSK+tGSK	298.93	234	84.85	421.76	360	70.1	2.10799
	pGSK+tGSK	303.86	251	77.02	445.55	387	62.82
	tGSK	253.03	202	80.39	206.99	181	62.8
	tGSK	300.97	242	76.47	204.45	181	71.92
	none	40.02	32	86.5	58.49	46	87.52
LPSCM 2	pGSK+tGSK	278.82	217	88.12	471.96	402	74.49	2.1726
	pGSK+tGSK	264.02	210	87.4	459.91	387	72.4
	tGSK	280.75	225	96.27	216.37	181	114.16
	tGSK	284.99	225	84.08	212.55	181	84.01
	none	44.25	33	122.62	63.7	48	115.7
LPSCM 3	pGSK+tGSK	188.29	151	83.24	364.14	312	86.12	2.56012
	pGSK+tGSK	198.2	151	98.73	364.7	312	94.95
	tGSK	211.41	169	76.77	149.31	122	105.36
	tGSK	185.86	151	74.12	135.38	113	199.29
	none	27.79	22	257.53	41.49	32	191.54
LPSCM 4	pGSK+tGSK	243.15	195	78.34	472.15	402	73.48	2.79504
	pGSK+tGSK	230.56	188	75.88	460.61	402	64.52
	tGSK	224.65	181	76.87	167.85	141	96.86
	tGSK	208.22	169	74.56	165.87	141	67.7
	none	35.42	29	86.14	51.99	41	102.14
LPSCM 5	pGSK+tGSK	213.5	169	89.44	511.44	432	75.15	2.32431
	pGSK+tGSK	197.61	157	90.9	495.08	416	77.42
	tGSK	228.96	175	96.55	224.61	181	125.02
	tGSK	186.05	146	83.34	208.43	175	70.19
	none	42.63	33	83.6	74.38	55	93.84
LPSCM 6	pGSK+tGSK	226.67	181	84.01	617.69	517	74.43	2.42468
	pGSK+tGSK	237.6	188	90.92	609.44	499	74.9
	tGSK	205.05	163	80.49	259.54	202	99.24
	tGSK	195.24	151	108.43	246.56	188	110.42
	none	53.49	40	101.37	93.66	64	111.39
LPSCM + Mg 1	pGSK+tGSK	378.21	312	74.54	668.17	576	65.84	2.35808
	pGSK+tGSK	450.96	374	72.2	656.27	556	65.02
	tGSK	405.17	323	77.03	279.88	234	71.31
	tGSK	434.33	360	73.71	281.78	234	71.87
	none	62.55	46	119.23	93.88	68	109.6
LPSCM + Mg 2	pGSK+tGSK	232.71	141	115.57	359.12	225	124.88	1.48322
	pGSK+tGSK	255.46	163	110.74	416.9	270	130.39
	tGSK	207.86	126	119.56	241.63	141	152.96
	tGSK	269.87	175	109.53	281.57	169	135.3
	none	59.89	36	120.22	112.44	61	125.93
LPSCM + Mg 3	pGSK+tGSK	286.72	225	78.44	663.66	536	73.96	3.22062
	pGSK+tGSK	296.18	234	81.81	647.84	517	73.78
	tGSK	291.02	234	79.38	203.61	163	83.88
	tGSK
	none	46.35	34	156.53	68.53	49	131.2
LPSCM + Mg 4	pGSK+tGSK	173.73	141	87.11	466.5	402	70.05	2.60546
	pGSK+tGSK	162.08	126	82.31	480.35	416	70.11
	tGSK	117.92	95	74.3	181.96	151	81.94
	tGSK	133.68	109	77.14	181.45	151	75.16
	none	34.71	28	180.6	56.7	44	148.75
LPSCM + Mg 5	pGSK+tGSK	217.67	175	83.95	533.14	464	73.29	2.21174
	pGSK+tGSK
	tGSK	258.21	195	86.51	246.51	202	92.72
	tGSK	256.6	195	89.48	235.59	195	96.11
	none	36.98	30	87.71	58.67	46	87.37
LPSCM + Mg 6	pGSK+tGSK	260.47	202	81.49	634.71	536	63.33	2.23673
	pGSK+tGSK	196.08	151	81.83	550.42	481	60.69
	tGSK	258.02	195	84.17	261.61	225	82.08
	tGSK	297.75	234	78.99	268.24	234	71.69
	none	40.93	32	179.04	66.76	49	151.64
LPSCM + Mg-1.6Li 1	pGSK+tGSK	391.5	312	81.96	800.24	666	75.6	2.89692
	pGSK+tGSK	365.74	301	75.51	756.77	642	72.14
	tGSK	336.86	270	82.89	269.79	217	86.95
	tGSK	374.54	301	81.5	267.68	217	92.58
	none	64.38	46	148.46	96.64	68	136.55
LPSCM + Mg-1.6Li 2	pGSK+tGSK	314.88	251	83.5	808.66	666	76.03	2.7951
	pGSK+tGSK	369.77	290	81.04	795.56	666	73.71
	tGSK	397.07	312	83.04	290.41	234	89.49
	tGSK	354.71	270	88.74	283.53	225	89.04
	none	70.61	48	273.74	105.49	71	214.39
LPSCM + Mg-1.6Li 3	pGSK+tGSK	259.04	181	93.24	678.24	481	91.46	2.69816
	pGSK+tGSK	268.64	188	96.36	681.82	481	91.17
	tGSK	309.16	202	107.56	257.77	157	128.71
	tGSK	279.23	195	106.65	246.3	157	136.96
	none	42.26	31	87.31	66.11	48	90.68
LPSCM + Mg-1.6Li 4	pGSK+tGSK	229.49	169	104.07	639.2	517	77.74	2.99291
	pGSK+tGSK	295.82	217	124.73	668.52	536	79.62
	tGSK	249.38	188	88.02	218.9	169	117.3
	tGSK	244.06	188	81.9	218.04	163	93.39
	none	57.22	38	220.19	97.02	59	198.56
LPSCM + Mg-1.6Li 5	pGSK+tGSK	388.78	312	78.93	880.92	742	71.42	2.49316
	pGSK+tGSK	394.09	312	81.55	867.93	716	71.97
	tGSK	410.19	335	76.35	367.18	290	86.75
	tGSK	461	348	86.19	334.28	260	87.48
	none	64.86	48	118.67	115.6	79	114.31
LPSCM + Mg-1.6Li 6	pGSK+tGSK	368.91	301	79.26	837.93	716	71.32	2.99745
	pGSK+tGSK	331.99	260	82.23	866.21	716	71.97
	tGSK	294.69	234	81.75	283.98	225	85.01
	tGSK	409.79	323	79.47	284.55	225	83.45
	none	85.11	48	189.31	158.17	79	187.12
LPSCM + Mg-9.5Li 1	pGSK+tGSK	364.6	270	85.21	1135.84	956	75.81	3.59384
	pGSK+tGSK	326.35	251	78.86	1036.24	889	72.15
	tGSK	358.9	280	79.37	312.09	260	77.28
	tGSK	320.25	251	75.08	292.3	242	65.61
	none	90.77	68	106.14	145.35	106	113.49
LPSCM + Mg-9.5Li 2	pGSK+tGSK	445.96	312	94.27	1335.36	1065	80.88	3.84784
	pGSK+tGSK	343.36	251	85.24	1148.42	922	80.69
	tGSK	388.67	280	90.69	337.69	251	90.22
	tGSK	357.75	270	75.48	307.81	242	75.48
	none	91.84	68	74.48	146.86	102	98.88
LPSCM + Mg-9.5Li 3	pGSK+tGSK	210.18	151	86.01	546.68	416	90.64	2.27161
	pGSK+tGSK	181.53	136	80.26	475.09	374	83.08
	tGSK	210.47	169	78.31	191.56	151	113.32
	tGSK	272.74	188	102.63	258.24	169	117.97
	none
LPSCM + Mg-9.5Li 4	pGSK+tGSK	251.11	195	82.13	1074.23	889	75.54	3.98465
	pGSK+tGSK	259.36	195	80.55	1069.55	858	75.93
	tGSK	267.89	202	81.45	268.06	202	92.13
	tGSK	275.35	210	86.73	269.95	202	88.03
	none	69.76	53	85.79	110.52	79	91.5
LPSCM + Mg-9.5Li 5	pGSK+tGSK	584.45	464	74.33	1646.36	1323	69.19	3.60248
	pGSK+tGSK	595.1	464	77.9	1649.73	1323	70.83
	tGSK	499.27	387	70.98	462.35	348	79.95
	tGSK	507.98	387	72.86	452.6	348	78.64
	none	154.91	122	112.58	230.23	169	107.61
LPSCM + LiCl (0.8 mM) 1	pGSK+tGSK	190.78	141	95.27	278.82	217	94.5	2.87102
	pGSK+tGSK	158.4	118	91	267.22	202	121.22
	tGSK	146.84	118	73.1	96.59	76	102.76
	tGSK	169.85	131	87.62	93.6	71	171.08
	none	32.86	23	377.52	39.08	27	359.19
LPSCM + LiCl (0.8 mM) 2	pGSK+tGSK	214.73	163	104.67	557.38	448	83.1	2.92254
	pGSK+tGSK	214.78	169	84.15	545.79	448	79.33
	tGSK	209.5	163	89.77	190.99	146	110.17
	tGSK	245.27	181	116.54	186.48	141	103.3
	none	42.43	31	142.17	72.18	44	229.71
LPSCM + LiCl (0.8 mM) 3	pGSK+tGSK	420.47	335	84.75	443.89	374	84.34	2.83869
	pGSK+tGSK	392.02	312	82.32	438.26	374	69.66
	tGSK	379.64	301	76.69	155.82	136	70.45
	tGSK	354.8	290	77.55	154.94	131	96.81
	none	39.37	31	206.18	57.7	44	178.45
LPSCM + LiCl (0.8 mM) 4	pGSK+tGSK	253.65	195	84.56	468.27	402	71.23	3.34037
	pGSK+tGSK
	tGSK	234.19	188	79.75	141.33	118	89.85
	tGSK	232.94	181	83.25	139.04	118	71.94
	none	37.37	30	165.91	53.6	41	151.95
LPSCM + LiCl (0.8 mM) 5	pGSK+tGSK	293.87	195	118.24	290.27	202	115.32	1.8631
	pGSK+tGSK	284.09	188	112.25	283.49	195	112.38
	tGSK	298.19	195	106.14	158.3	122	94.28
	tGSK	291.08	195	105.93	149.66	113	94.91
	none	40.4	31	96.91	61.93	44	150.38
LPSCM + LiCl (4.2 mM) 1	pGSK+tGSK	234.81	175	91.79	1059.03	858	83.51	3.18525
	pGSK+tGSK	221.55	163	93.26	1016.89	827	81.33
	tGSK	257.37	188	89.31	332.57	242	101.21
	tGSK	246.14	181	102.24	319.16	225	114.22
	none
LPSCM + LiCl (4.2 mM) 2	pGSK+tGSK	276.94	210	86.98	892.29	716	79.74	3.61136
	pGSK+tGSK	284.72	217	89.17	901.8	716	80.8
	tGSK	290.16	225	87.29	246.3	188	89.46
	tGSK	280.84	210	87.19	250.49	188	84.1
	none	60.13	44	89.21	92.22	66	93.85
LPSCM + LiCl (4.2 mM) 3	pGSK+tGSK	323.86	242	92.75	864.12	691	77.67	4.18538
	pGSK+tGSK	310.4	234	85.9	900.06	716	77.87
	tGSK	343.65	260	85.41	211.9	163	80.66
	tGSK	379.54	290	86.72	209.61	163	81.29
	none	91.73	71	133.35	95.87	68	137.48
LPSCM + LiCl (4.2 mM) 4	pGSK+tGSK	513.96	374	94.54	886.98	691	78.4	3.53226
	pGSK+tGSK	533.06	387	91.23	874.17	691	80.14
	tGSK	409.94	301	87.17	252.48	195	101.4
	tGSK	470.75	360	90.79	246.11	188	117.05
	none	100.95	71	245.24	108.8	74	188.21
LPSCM + LiCl (4.2 mM) 5	pGSK+tGSK	402.79	301	90.62	871.14	691	82.13	3.5428
	pGSK+tGSK
	tGSK	388.16	290	88.13	245.89	188	92.7
	tGSK
	none	64.25	48	118.88	102.07	74	118.11

## Sheet: IM-HA
Sample type	Antibodies added	Intensity FL1 (525/30 nm emission filter)			Intensity FL3 (615/25 nm emission filter)			P_rel (I_FL3,pGSK+tGSK/I_FL3,tGSK)
		mean	median	CV	mean	median	CV			tGSK	Alexa Fluor® 488 conjugated anti-GSK3β antibody (Monoclonal Rat IgG2b, 0.5 μg/mL)
untreated 1	pGSK+tGSK	265.61	181	105.49	372.27	290	79.82	2.02821		pGSK	anti-phospho-GSK3β (Ser9) antibody (monoclonal rabbit IgG, 1 µg/mL)
	pGSK+tGSK	255.44	169	103.76	396.3	301	83.44			secondary antibody	Goat anti-rabbit antibody, texas-red conjugated (4 µg/mL)
	tGSK	208.28	151	96.32	183.29	151	87.46
	tGSK	189.19	131	104.85	195.65	151	98.26
	none	46.2	31	128.52	76.04	49	242.82
untreated 2	pGSK+tGSK	258.25	157	114.33	362.9	251	94.3	1.925
	pGSK+tGSK	220.03	136	108.12	359.11	251	88.65
	tGSK	191.91	118	127.23	171.01	118	129.49
	tGSK	228.19	141	110	204.06	136	114.23
	none	34.49	24	245.18	52.69	37	180.83
untreated 3	pGSK+tGSK	221.33	157	97.87	341.47	270	78.02	1.81644
	pGSK+tGSK	262.74	195	94.69	351.03	280	75.52
	tGSK	241.47	175	104.04	204.22	157	121.75
	tGSK	249.94	181	98.11	177.02	146	81.34
	none	45.6	25	105	51.41	38	119.88
untreated 4	pGSK+tGSK	241.21	169	117.57	362.2	270	107.86	1.47972
	pGSK+tGSK	237.33	169	97.82	340.06	270	83.72
	tGSK	212.64	151	110.37	239.69	175	116.22
	tGSK	183.46	131	97.13	234.9	175	111.86
	none	60.16	41	115.94	89.02	61	151.41
untreated 5	pGSK+tGSK	153.25	102	119.85	236.46	188	77.06	1.70618
	pGSK+tGSK
	tGSK	156.91	106	123.89	138.59	109	83.37
	tGSK
	none	29.72	22	119.21	48.07	36	108.18
LPSCM 1	pGSK+tGSK	348.24	210	131.57	304.59	234	87.32	1.32505
	pGSK+tGSK	319.38	195	131.22	312.02	234	90.67
	tGSK	342.96	210	132.26	237.11	181	83.68
	tGSK	298.64	181	127.01	228.24	175	86.75
	none	66.68	48	98.53	219.18	163	106.89
LPSCM 2	pGSK+tGSK	320.71	217	117.95	312.3	251	80.35	1.48945
	pGSK+tGSK	323.77	217	107.41	308.07	251	75.79
	tGSK	307.14	210	115.18	205.84	169	75.86
	tGSK	314.62	210	112.09	210.67	169	84.96
	none	54.5	40	183.37	191.84	157	92.49
LPSCM 3	pGSK+tGSK	308.71	202	100.76	431.34	301	86.62	1.4798
	pGSK+tGSK	282.32	181	103.89	390.82	280	82.29
	tGSK	275.37	181	97.7	279.03	195	90
	tGSK	307.68	188	104.67	276.56	188	91.38
	none	63.52	44	84.83	103.52	71	147.83
LPSCM 4	pGSK+tGSK	299.76	210	105.06	316.91	260	70.17	1.60705
	pGSK+tGSK	282.54	202	108.04	301.79	251	92.1
	tGSK	285.55	202	110.48	190.07	151	78.18
	tGSK	304.95	210	106.16	194.92	157	73.76
	none	45.95	34	172.71	72.89	51	150.94
LPSCM 5	pGSK+tGSK	305.98	202	117.48	398.87	301	87.38	1.76167
	pGSK+tGSK	335.33	210	115.67	434.17	312	88.75
	tGSK	233.83	163	108.43	229.19	175	110.46
	tGSK	242.11	163	111.73	243.68	181	122.18
	none	44.68	33	145.15	72.82	55	127.64
LPSCM 6	pGSK+tGSK	339.64	210	115.36	466.38	335	88.45	1.80666
	pGSK+tGSK	357.91	217	117.32	458.34	335	82.82
	tGSK	236.15	157	108.75	236.23	181	88.4
	tGSK	265.52	163	111.86	275.61	195	95.31
	none	53.8	37	247.87	86.28	59	185.61
LPSCM + Mg 1	pGSK+tGSK	460.18	312	105.9	381.12	301	73.56	1.65526
	pGSK+tGSK	436.91	301	109.12	393.25	312	82.22
	pGSK+tGSK	432.63	301	105.16	396.41	301	83.43
	tGSK	407.95	280	103.72	237.12	181	81.33
	tGSK	372.62	260	107.2	234.42	188	72.13
	none	63	48	122.51	212.14	169	84.92
LPSCM + Mg 2	pGSK+tGSK	295.35	210	100	399.48	312	76.42	1.9102
	pGSK+tGSK
	tGSK	259.6	181	98.89	208.18	157	82.59
	tGSK	273.48	188	102.75	210.08	157	105.73
	none	55.62	40	113.33	90.05	64	107.91
LPSCM + Mg 3	pGSK+tGSK	356.33	217	116.49	552.16	402	90.01	1.81722
	pGSK+tGSK	299.2	181	110.62	585.29	402	92.26
	tGSK	245.99	157	113.41	325.49	225	103.06
	tGSK	232.92	151	105.91	300.44	210	94.92
	none
LPSCM + Mg 4	pGSK+tGSK	432.73	270	111.1	611.73	432	96.75	1.668
	pGSK+tGSK	426.36	270	111.49	617.2	432	93.12
	tGSK	474.18	301	112.23	373.9	251	117.47
	tGSK	444.42	280	109.5	362.87	242	111.26
	none	77.11	53	140	133.35	88	133.29
LPSCM + Mg-1.6Li 1	pGSK+tGSK	367.26	225	122.03	464.37	323	107.59	1.4806
	pGSK+tGSK	411.97	251	122.1	465.63	323	109.99
	pGSK+tGSK	382.78	242	130.21	462.66	323	120.9
	tGSK	439.89	270	112.8	317.92	217	107.71
	tGSK	424.1	270	113.49	309.15	217	95.41
	none	90.94	55	150.5	290.66	195	109.98
LPSCM + Mg-1.6Li 2	pGSK+tGSK	332.93	217	108.91	428.55	312	86.51	1.59777
	pGSK+tGSK	315.02	210	105.61	416.95	312	82.01
	pGSK+tGSK	335.91	217	109.46	414.25	301	88.56
	tGSK	347.81	225	116.48	266.98	195	104.32
	tGSK	306.74	202	110.08	258.65	188	100.92
	none	77.83	51	176.07	244.51	175	102.75
LPSCM + Mg-1.6Li 3	pGSK+tGSK	244.56	146	131.11	474.28	360	83.69	1.6445
	pGSK+tGSK	273.67	163	121.8	554.65	387	94.76
	tGSK
	tGSK	324.9	188	119.87	312.84	195	128.61
	none
LPSCM + Mg-1.6Li 4	pGSK+tGSK	387.78	242	111.34	715.06	499	96.39	1.54768
	pGSK+tGSK
	tGSK	461.87	290	114.79	462.02	301	118.38
	tGSK
	none	71	50	110.12	112.22	77	122.3
LPSCM + Mg-9.5Li 1	pGSK+tGSK	520.87	387	96.93	626.02	499	71.53	1.97481
	pGSK+tGSK	524.46	387	90.3	586.61	481	62.91
	tGSK	559.75	387	99.01	319	251	86.35
	tGSK	539.5	387	98.2	295.05	234	84.66
	none	78.09	55	195.3	125.28	88	170.95
LPSCM + Mg-9.5Li 2	pGSK+tGSK	304.68	195	100.11	706.47	499	83.62	2.6442
	pGSK+tGSK	270.56	175	101.1	669.07	481	82.35
	tGSK	317.42	202	99.86	292	195	100.24
	tGSK	225.86	151	101.75	228.21	151	116.41
	none	69	48	108.07	114.18	79	124.8
LPSCM + Mg-9.5Li 3	pGSK+tGSK	321.16	225	98.94	642.4	499	77.15	2.64539
	pGSK+tGSK	322.82	217	108.85	654.9	499	83.56
	tGSK	313.28	225	105.56	242.96	181	105.12
	tGSK	377.43	260	103.98	247.44	181	91.8
	none	71.21	49	163.33	107.13	74	108.53
LPSCM + Mg-9.5Li 4	pGSK+tGSK	604.42	387	106.74	1030.75	742	86.96	2.79627
	pGSK+tGSK	494.56	312	105.61	998.53	691	90.46
	tGSK	588.07	387	105.4	369.65	280	85.99
	tGSK	525.29	348	107.21	356.06	251	98.01
	none	92.41	59	147.18	157.84	102	119.45
LPSCM + Mg-9.5Li 5	pGSK+tGSK	540.51	374	97.25	757.29	556	84.92	2.79107
	pGSK+tGSK	553.72	360	102.74	787.4	556	88.83
	tGSK	531.54	360	98.92	276.72	202	90.74
	tGSK
	none	84.95	59	143.11	132.18	88	134.23
LPSCM + Mg-9.5Li 6	pGSK+tGSK	476.97	323	97.34	782.47	556	87.53	2.22295
	pGSK+tGSK	457.59	312	92.39	770.44	556	83.34
	tGSK	428.25	290	96.97	359.89	251	100.8
	tGSK	462.68	312	96.96	338.69	242	98.14
	none	111.56	76	124.12	181.36	118	116.39
LPSCM + LiCl (0.8 mM) 1	pGSK+tGSK	155.15	109	100.2	292.1	242	64.13	1.67714
	pGSK+tGSK	197.76	131	109.77	337.95	260	91.23
	tGSK	202.21	136	110.09	202.37	151	94.62
	tGSK	169.97	118	113.05	173.3	136	97.39
	none	39.77	30	104.73	64.17	46	110.94
LPSCM + LiCl (0.8 mM) 2	pGSK+tGSK	207.85	146	103.77	332.61	270	74.04	1.77067
	pGSK+tGSK	230.88	163	104.1	336.1	270	73.8
	tGSK	188.58	131	101.5	183.98	141	104.43
	tGSK	224.49	146	107.97	193.68	146	80.33
	none	48.57	36	96.51	78.5	57	107.79
LPSCM + LiCl (0.8 mM) 3	pGSK+tGSK	337.15	225	99.99	426.95	301	87.09	1.78843
	pGSK+tGSK	413.33	270	102.88	431.73	301	90.87
	tGSK	449	290	108.02	243.29	169	107.79
	tGSK	429.5	280	104.07	236.84	163	108.05
	none	70.54	47	160.73	72.75	52	95.68
LPSCM + LiCl (0.8 mM) 4	pGSK+tGSK	424.49	280	101.74	420.83	301	94.02	1.53436
	pGSK+tGSK	412.91	270	105.29	403.61	301	87.09
	tGSK	390.86	260	98.69	264.65	181	108.88
	tGSK	378.01	251	97.78	272.67	181	100.02
	none
LPSCM + LiCl (4.2 mM) 1	pGSK+tGSK	219.36	157	95.34	482.25	402	71.68	2.18139
	pGSK+tGSK	195.25	141	97.85	496.78	402	72.81
	tGSK	198.87	146	93.11	223.31	175	91.75
	tGSK	213.76	151	97.7	225.5	175	92.86
	none	42.14	31	84.78	69.92	49	93.79
LPSCM + LiCl (4.2 mM) 2	pGSK+tGSK	229.18	163	105.61	481.11	387	69.88	2.55001
	pGSK+tGSK	249.6	175	105.89	494.65	402	74.05
	tGSK	251.96	181	97.22	197.27	157	88.79
	tGSK	231.38	163	100.06	185.38	151	70.39
	none	41.54	32	88.94	68.35	51	95.52
LPSCM + LiCl (4.2 mM) 3	pGSK+tGSK	389.48	260	102.86	552	416	85.63	2.64926
	pGSK+tGSK
	tGSK	478.38	312	104.51	208.36	151	100.55
	tGSK
	none
LPSCM + LiCl (4.2 mM) 4	pGSK+tGSK	526.58	360	101.25	624.59	481	80.13	3.17988
	pGSK+tGSK	525.01	360	98.21	666.6	499	82.02
	tGSK	496.01	335	100.37	201.22	151	89.05
	tGSK	533.87	360	102.46	204.83	151	98.57
	none	60.79	44	125.11	80.35	57	121.61
LPSCM + LiCl (4.2 mM) 5	pGSK+tGSK	411.36	280	101.76	621.25	464	81.68	3.18564
	pGSK+tGSK	431.8	280	108.72	626.47	464	82.86
	tGSK	395	251	111.17	193.51	141	106.84
	tGSK	506.85	335	104.16	198.16	146	84.89
	none	57.61	43	139.73	86.79	64	90.02
Some measurements missing since cell numbers were not sufficient due to sample handling errors
